# Supplementary material for: Deep Sequencing of Early T Stage Colorectal Cancers Reveals Disruption of Homologous Recombination Repair in Microsatellite Stable Tumours with High Mutational Burdens
Source: Cancers (Basel). 2022 Jun 14;14(12):2933. doi: 10.3390/cancers14122933 (PMC9221133; doi:10.3390/cancers14122933)
Supplement: Supplementary file 1 [file cancers-14-02933-s001.zip › Supplementary Table S2. Table of mutations in HRR genes in MSS TMB-H samples.xlsx]

## Sheet: Table S2
Hugo_Symbol	Entrez_Gene_Id	Center	NCBI_Build	Chromosome	Start_Position	End_Position	Strand	Variant_Classification	Variant_Type	Reference_Allele	Tumor_Seq_Allele1	Tumor_Seq_Allele2	dbSNP_RS	dbSNP_Val_Status	Tumor_Sample_Barcode	HGVSc	HGVSp	HGVSp_Short	Transcript_ID	Exon_Number	t_depth	t_ref_count	t_alt_count	Variant Allele Fraction	all_effects	Allele	Gene	Feature	Feature_type	Consequence	cDNA_position	CDS_position	Protein_position	Amino_acids	Codons	Existing_variation	ALLELE_NUM	DISTANCE	STRAND_VEP	SYMBOL	SYMBOL_SOURCE	HGNC_ID	BIOTYPE	CANONICAL	CCDS	ENSP	SWISSPROT	TREMBL	UNIPARC
PTEN	5728	.	GRCh37	chr10	89720852	89720852	+	Nonsense_Mutation	SNP	C	C	T	rs121909231		S121	c.1003C>T	p.Arg335Ter	p.R335*	ENST00000371953	8/9	192	177	10	0.0534759	PTEN,stop_gained,p.Arg335Ter,ENST00000371953,NM_000314.4;PTEN,non_coding_transcript_exon_variant,,ENST00000472832,;,regulatory_region_variant,,ENSR00000984554,;	T	ENSG00000171862	ENST00000371953	Transcript	stop_gained	2360/9027	1003/1212	335/403	R/*	Cga/Tga	rs121909231,CM971278,COSM5151,COSM921156	1		1	PTEN	HGNC	9588	protein_coding	YES	CCDS31238.1	ENSP00000361021	P60484	F6KD01,H6WA51,H6WA46	UPI00001328C5
CDK12	51755	.	GRCh37	chr17	37667819	37667819	+	Nonsense_Mutation	SNP	C	C	T			S121	c.2704C>T	p.Arg902Ter	p.R902*	ENST00000447079	8/14	316	294	20	0.0636943	CDK12,stop_gained,p.Arg902Ter,ENST00000447079,NM_015083.1,NM_016507.2;CDK12,stop_gained,p.Arg902Ter,ENST00000430627,;CDK12,stop_gained,p.Arg901Ter,ENST00000584632,;	T	ENSG00000167258	ENST00000447079	Transcript	stop_gained	2737/8336	2704/4473	902/1490	R/*	Cga/Tga	COSM6016609,COSM7286180	1		1	CDK12	HGNC	24224	protein_coding	YES	CCDS11337.1	ENSP00000398880	Q9NYV4		UPI000013E688
CDK12	51755	.	GRCh37	chr17	37680974	37680974	+	Missense_Mutation	SNP	G	G	A	rs1357617308		S121	c.3143G>A	p.Arg1048Gln	p.R1048Q	ENST00000447079	12/14	511	467	35	0.0697211	CDK12,missense_variant,p.Arg1048Gln,ENST00000447079,NM_015083.1,NM_016507.2;CDK12,missense_variant,p.Arg1048Gln,ENST00000430627,;CDK12,missense_variant,p.Arg1047Gln,ENST00000584632,;CDK12,upstream_gene_variant,,ENST00000559663,;	A	ENSG00000167258	ENST00000447079	Transcript	missense_variant	3176/8336	3143/4473	1048/1490	R/Q	cGa/cAa	rs1357617308	1		1	CDK12	HGNC	24224	protein_coding	YES	CCDS11337.1	ENSP00000398880	Q9NYV4		UPI000013E688
CDK12	51755	.	GRCh37	chr17	37681003	37681003	+	Missense_Mutation	SNP	G	G	A	rs1225789669		S121	c.3172G>A	p.Glu1058Lys	p.E1058K	ENST00000447079	12/14	510	464	41	0.0811881	CDK12,missense_variant,p.Glu1058Lys,ENST00000447079,NM_015083.1,NM_016507.2;CDK12,missense_variant,p.Glu1058Lys,ENST00000430627,;CDK12,missense_variant,p.Glu1057Lys,ENST00000584632,;CDK12,upstream_gene_variant,,ENST00000559663,;	A	ENSG00000167258	ENST00000447079	Transcript	missense_variant	3205/8336	3172/4473	1058/1490	E/K	Gaa/Aaa	rs1225789669	1		1	CDK12	HGNC	24224	protein_coding	YES	CCDS11337.1	ENSP00000398880	Q9NYV4		UPI000013E688
ATR	545	.	GRCh37	chr3	142268449	142268449	+	Nonsense_Mutation	SNP	G	G	A	rs1453839157		3a5	c.3043C>T	p.Arg1015Ter	p.R1015*	ENST00000350721	15/47	267	248	15	0.0570342	ATR,stop_gained,p.Arg1015Ter,ENST00000350721,NM_001184.3;ATR,stop_gained,p.Arg951Ter,ENST00000383101,;	A	ENSG00000175054	ENST00000350721	Transcript	stop_gained	3165/8249	3043/7935	1015/2644	R/*	Cga/Tga	rs1453839157	1		-1	ATR	HGNC	882	protein_coding	YES	CCDS3124.1	ENSP00000343741	Q13535		UPI0000031A31
ATR	545	.	GRCh37	chr3	142281601	142281601	+	Missense_Mutation	SNP	G	G	A	rs1464478582		3a5	c.643C>T	p.Arg215Cys	p.R215C	ENST00000350721	4/47	938	879	48	0.0517799	ATR,missense_variant,p.Arg215Cys,ENST00000350721,NM_001184.3;ATR,missense_variant,p.Arg215Cys,ENST00000383101,;ATR,upstream_gene_variant,,ENST00000515149,;ATR,intron_variant,,ENST00000507148,;ATR,upstream_gene_variant,,ENST00000515863,;	A	ENSG00000175054	ENST00000350721	Transcript	missense_variant	765/8249	643/7935	215/2644	R/C	Cgt/Tgt	rs1464478582,COSM5989770	1		-1	ATR	HGNC	882	protein_coding	YES	CCDS3124.1	ENSP00000343741	Q13535		UPI0000031A31
PTEN	5728	.	GRCh37	chr10	89717777	89717777	+	Splice_Site	SNP	G	G	A	rs786204873		3a5	c.801+1G>A		p.X267_splice	ENST00000371953		441	412	27	0.0615034	PTEN,splice_donor_variant,,ENST00000371953,NM_000314.4;PTEN,splice_donor_variant,,ENST00000472832,;	A	ENSG00000171862	ENST00000371953	Transcript	splice_donor_variant						rs786204873,CD011189,CS992481,CS002685,COSM5970	1		1	PTEN	HGNC	9588	protein_coding	YES	CCDS31238.1	ENSP00000361021	P60484	F6KD01,H6WA51,H6WA46	UPI00001328C5
ATM	472	.	GRCh37	chr11	108122689	108122689	+	Missense_Mutation	SNP	A	A	G	rs1266358260		3a5	c.1733A>G	p.Lys578Arg	p.K578R	ENST00000278616	11/63	355	334	20	0.0564972	ATM,missense_variant,p.Lys578Arg,ENST00000278616,NM_000051.3;ATM,missense_variant,p.Lys578Arg,ENST00000452508,;ATM,missense_variant,p.Lys578Arg,ENST00000527805,;ATM,upstream_gene_variant,,ENST00000525012,;ATM,upstream_gene_variant,,ENST00000533526,;	G	ENSG00000149311	ENST00000278616	Transcript	missense_variant	2118/13147	1733/9171	578/3056	K/R	aAa/aGa	rs1266358260	1		1	ATM	HGNC	795	protein_coding	YES	CCDS31669.1	ENSP00000278616	Q13315	M0QXY8,E9PRG7,E9PIN0	UPI0000DBEF44
CDK12	51755	.	GRCh37	chr17	37667819	37667819	+	Nonsense_Mutation	SNP	C	C	T			3a5	c.2704C>T	p.Arg902Ter	p.R902*	ENST00000447079	8/14	599	539	55	0.0925926	CDK12,stop_gained,p.Arg902Ter,ENST00000447079,NM_015083.1,NM_016507.2;CDK12,stop_gained,p.Arg902Ter,ENST00000430627,;CDK12,stop_gained,p.Arg901Ter,ENST00000584632,;	T	ENSG00000167258	ENST00000447079	Transcript	stop_gained	2737/8336	2704/4473	902/1490	R/*	Cga/Tga	COSM6016609,COSM7286180	1		1	CDK12	HGNC	24224	protein_coding	YES	CCDS11337.1	ENSP00000398880	Q9NYV4		UPI000013E688
CDK12	51755	.	GRCh37	chr17	37682260	37682260	+	Missense_Mutation	SNP	G	G	A	novel		3a5	c.3451G>A	p.Glu1151Lys	p.E1151K	ENST00000447079	13/14	226	213	12	0.0533333	CDK12,missense_variant,p.Glu1151Lys,ENST00000447079,NM_015083.1,NM_016507.2;CDK12,missense_variant,p.Glu1151Lys,ENST00000430627,;CDK12,missense_variant,p.Glu1150Lys,ENST00000584632,;CDK12,missense_variant,p.Glu48Lys,ENST00000559663,;CDK12,upstream_gene_variant,,ENST00000584336,;	A	ENSG00000167258	ENST00000447079	Transcript	missense_variant	3484/8336	3451/4473	1151/1490	E/K	Gaa/Aaa		1		1	CDK12	HGNC	24224	protein_coding	YES	CCDS11337.1	ENSP00000398880	Q9NYV4		UPI000013E688
PTEN	5728	.	GRCh37	chr10	89692892	89692892	+	Missense_Mutation	SNP	G	G	A			26	c.376G>A	p.Ala126Thr	p.A126T	ENST00000371953	5/9	3081	2252	819	0.266688	PTEN,missense_variant,p.Ala126Thr,ENST00000371953,NM_000314.4;PTEN,non_coding_transcript_exon_variant,,ENST00000498703,;,regulatory_region_variant,,ENSR00000984548,;	A	ENSG00000171862	ENST00000371953	Transcript	missense_variant	1733/9027	376/1212	126/403	A/T	Gct/Act	CM110132,COSM28889,COSM5051,COSM5211	1		1	PTEN	HGNC	9588	protein_coding	YES	CCDS31238.1	ENSP00000361021	P60484	F6KD01,H6WA51,H6WA46	UPI00001328C5
PTEN	5728	.	GRCh37	chr10	89692905	89692905	+	Missense_Mutation	SNP	G	G	A	rs121909229		26	c.389G>A	p.Arg130Gln	p.R130Q	ENST00000371953	5/9	3094	1920	1144	0.373368	PTEN,missense_variant,p.Arg130Gln,ENST00000371953,NM_000314.4;PTEN,non_coding_transcript_exon_variant,,ENST00000498703,;,regulatory_region_variant,,ENSR00000984548,;,TF_binding_site_variant,,ENSM00521903766,;	A	ENSG00000171862	ENST00000371953	Transcript	missense_variant	1746/9027	389/1212	130/403	R/Q	cGa/cAa	rs121909229,CM981670,CM991081,COSM5033,COSM5216,COSM5277,COSM5817	1		1	PTEN	HGNC	9588	protein_coding	YES	CCDS31238.1	ENSP00000361021	P60484	F6KD01,H6WA51,H6WA46	UPI00001328C5
ATM	472	.	GRCh37	chr11	108115600	108115600	+	Nonsense_Mutation	SNP	C	C	T	rs772821016		26	c.748C>T	p.Arg250Ter	p.R250*	ENST00000278616	7/63	1398	1147	226	0.164603	ATM,stop_gained,p.Arg250Ter,ENST00000278616,NM_000051.3;ATM,stop_gained,p.Arg250Ter,ENST00000452508,;ATM,stop_gained,p.Arg250Ter,ENST00000527805,;ATM,downstream_gene_variant,,ENST00000527891,;,regulatory_region_variant,,ENSR00001014906,;	T	ENSG00000149311	ENST00000278616	Transcript	stop_gained	1133/13147	748/9171	250/3056	R/*	Cga/Tga	rs772821016,CM030188,CS991299,COSM1135092,COSM173211	1		1	ATM	HGNC	795	protein_coding	YES	CCDS31669.1	ENSP00000278616	Q13315	M0QXY8,E9PRG7,E9PIN0	UPI0000DBEF44
ATR	545	.	GRCh37	chr3	142268449	142268449	+	Nonsense_Mutation	SNP	G	G	A	rs1453839157		s116	c.3043C>T	p.Arg1015Ter	p.R1015*	ENST00000350721	15/47	132	118	10	0.078125	ATR,stop_gained,p.Arg1015Ter,ENST00000350721,NM_001184.3;ATR,stop_gained,p.Arg951Ter,ENST00000383101,;	A	ENSG00000175054	ENST00000350721	Transcript	stop_gained	3165/8249	3043/7935	1015/2644	R/*	Cga/Tga	rs1453839157	1		-1	ATR	HGNC	882	protein_coding	YES	CCDS3124.1	ENSP00000343741	Q13535		UPI0000031A31
ATM	472	.	GRCh37	chr11	108115594	108115594	+	Nonsense_Mutation	SNP	C	C	T	rs730881336		s116	c.742C>T	p.Arg248Ter	p.R248*	ENST00000278616	7/63	553	516	35	0.0635209	ATM,stop_gained,p.Arg248Ter,ENST00000278616,NM_000051.3;ATM,stop_gained,p.Arg248Ter,ENST00000452508,;ATM,stop_gained,p.Arg248Ter,ENST00000527805,;ATM,downstream_gene_variant,,ENST00000527891,;,regulatory_region_variant,,ENSR00001014906,;	T	ENSG00000149311	ENST00000278616	Transcript	stop_gained	1127/13147	742/9171	248/3056	R/*	Cga/Tga	rs730881336,CM980133,COSM1506643,COSM1506644	1		1	ATM	HGNC	795	protein_coding	YES	CCDS31669.1	ENSP00000278616	Q13315	M0QXY8,E9PRG7,E9PIN0	UPI0000DBEF44
ATM	472	.	GRCh37	chr11	108236185	108236185	+	Missense_Mutation	SNP	G	G	A	novel		s116	c.9121G>A	p.Asp3041Asn	p.D3041N	ENST00000278616	63/63	322	289	21	0.0677419	ATM,missense_variant,p.Asp3041Asn,ENST00000278616,NM_000051.3;ATM,missense_variant,p.Asp3041Asn,ENST00000452508,;C11orf65,intron_variant,,ENST00000524755,;C11orf65,intron_variant,,ENST00000525729,;ATM,non_coding_transcript_exon_variant,,ENST00000525178,;C11orf65,intron_variant,,ENST00000526725,;ATM,non_coding_transcript_exon_variant,,ENST00000524792,;ATM,non_coding_transcript_exon_variant,,ENST00…	A	ENSG00000149311	ENST00000278616	Transcript	missense_variant	9506/13147	9121/9171	3041/3056	D/N	Gac/Aac		1		1	ATM	HGNC	795	protein_coding	YES	CCDS31669.1	ENSP00000278616	Q13315	M0QXY8,E9PRG7,E9PIN0	UPI0000DBEF44
[truncated: 45 more columns]
